# Supplementary material for: Identification and Verification of Potential Biomarkers in Renal Ischemia-Reperfusion Injury by Integrated Bioinformatic Analysis
Source: Biomed Res Int. 2023 Feb 2;2023:7629782. doi: 10.1155/2023/7629782 (PMC9911259; doi:10.1155/2023/7629782)
Supplement: Supplementary Materials — A list of the primary and secondary antibodies and primer sequences is available in Supplementary Table 1. The rt-PCR results of four genes in the sham group and the RIRI group are illustrated in Figure S1. [file 7629782.f1.zip]

Archive with 3 entries (3 files):
- Fig S1.pdf
- Supplementary table 1 (1).docx
- Supplementary Table 2 (1).docx
