# Supplementary figures and images for: Identification and Verification of Potential Biomarkers in Renal Ischemia‐Reperfusion Injury by Integrated Bioinformatic Analysis
Source: Hindawi journal article supplement (doi:10.1155/2023/7629782), 2023-01-01

After reperfusion 6 h

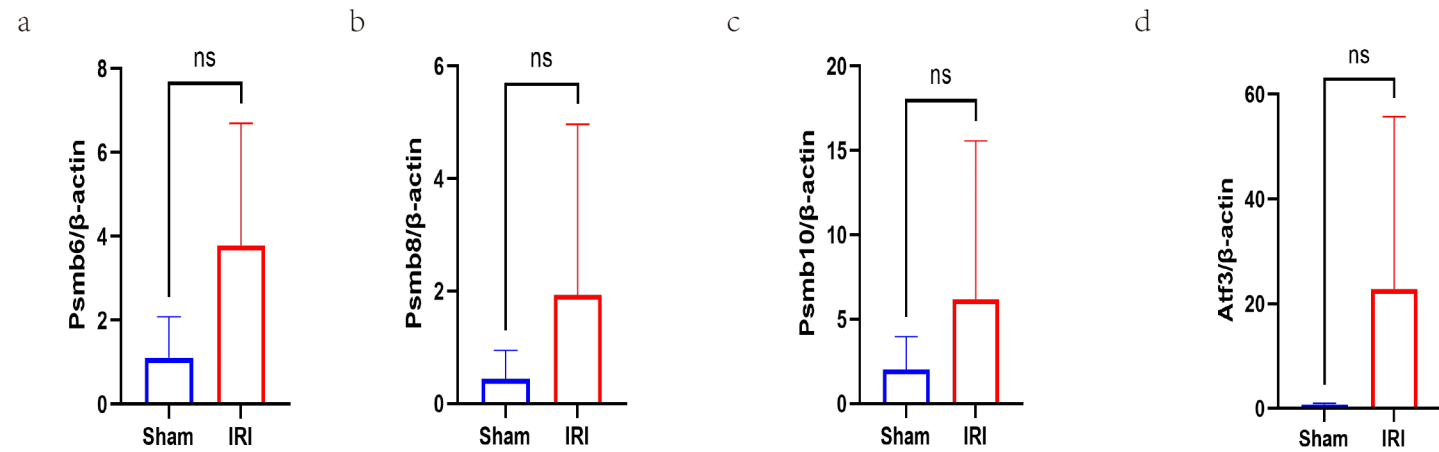

After reperfusion 24 h

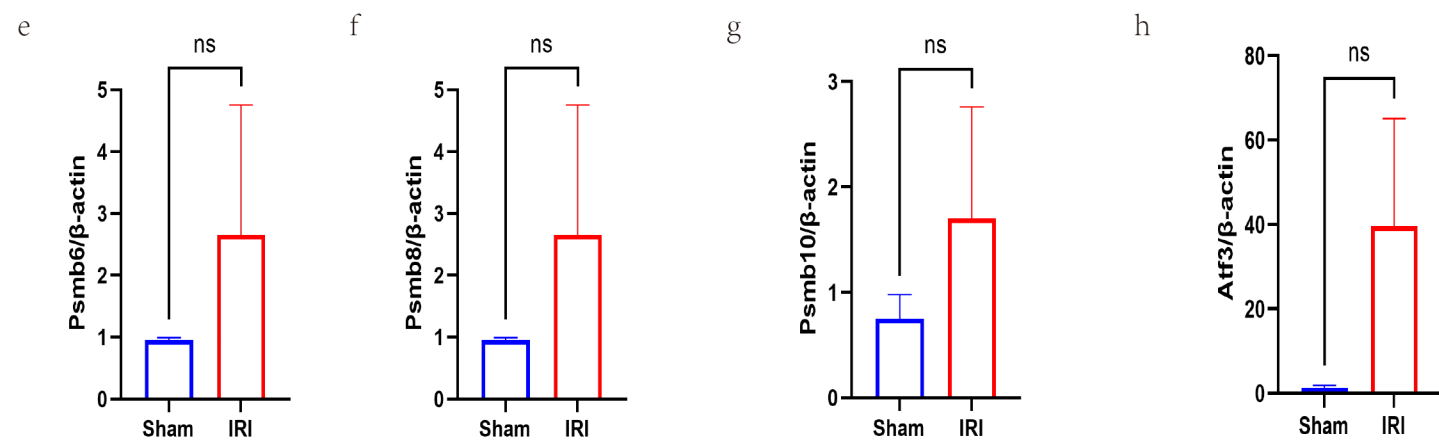

Supplement: f1 [file 7629782.f1.zip]
